# Supplementary material for: Association of Bone Mineral Density and Coronary Artery Calcification in Patients with Osteopenia and Osteoporosis
Source: PubMed Central journal article supplement (PMC7555969; doi:10.3390/diagnostics10090699), 2020-09-16
Supplement: diagnostics-10-00699-s001.pdf [file diagnostics-10-00699-s001.pdf]

Supplementary Table 1. Distribution of right femoral neck T-score in patients with hypertension or diabetes mellitus

| Disease                    | Right femoral neck |                               |                                              |                                     |
|----------------------------|--------------------|-------------------------------|----------------------------------------------|-------------------------------------|
|                            | Total              | Normal<br>T-score $\geq -1.0$ | Osteopenia<br>$-1.0 > \text{T-score} > -2.5$ | Osteoporosis<br>T-score $\leq -2.5$ |
| Hypertension<br>N (%)      | 57 (100)           | 12 (21.1)                     | 37 (64.9)                                    | 8 (14.0)                            |
| Diabetes mellitus<br>N (%) | 21 (100)           | 5 (23.8)                      | 14 (66.7)                                    | 2 (9.5)                             |

Supplementary Table 2. Distribution of left femoral neck T-score in patients with hypertension or diabetes mellitus

| Disease                    | Left femoral neck |                               |                                              |                                     |
|----------------------------|-------------------|-------------------------------|----------------------------------------------|-------------------------------------|
|                            | Total             | Normal<br>T-score $\geq -1.0$ | Osteopenia<br>$-1.0 > \text{T-score} > -2.5$ | Osteoporosis<br>T-score $\leq -2.5$ |
| Hypertension<br>N (%)      | 57 (100)          | 16 (28.1)                     | 36 (63.2)                                    | 5 (8.8)                             |
| Diabetes mellitus<br>N (%) | 21 (100)          | 9 (42.9)                      | 11 (52.4)                                    | 1 (4.8)                             |
